# Supplementary material for: Secondary Prevention in Lower Extremity Artery Disease Patients: Lipid-Lowering Therapy and Long-Term Guideline Adherence
Source: MDPI journal article supplement (doi:10.3390/jcm11226838), 2022-11-19
Supplement: s1 [file s1]

Supplements to

**Secondary Prevention in Lower Extremity Artery Disease Patients: Lipid-Lowering Therapy and Long-Term Guideline Adherence**

**Mueller L et al.**

Supplementary Table S1. Distribution of statin prescription and LDL-C values related to inclusion date

|                          | Admission | Discharge | Follow-up |
|--------------------------|-----------|-----------|-----------|
| Atorvastatin, %          |           |           |           |
| Pre 2019 guideline       | 28        | 67        | 66        |
| Post 2019 guideline      | 34        | 62        | 68        |
| Rosuvastatin, %          |           |           |           |
| Pre 2019 guideline       | 1         | 3         | 10        |
| Post 2019 guideline      | 11        | 16        | 16        |
| High-Intensity Statin, % |           |           |           |
| Pre 2019 guideline       | 29        | 70        | 76        |
| Post 2019 guideline      | 43        | 78        | 84        |
| Simvastatin, %           |           |           |           |
| Pre 2019 guideline       | 29        | 19        | 14        |
| Post 2019 guideline      | 17        | 11        | 7         |
| p-value                  | <0.001    | <0.004    | n.s.      |
| Ezetimibe, %             |           |           |           |
| Pre 2019 guideline       | n/a       | 20        | 27        |
| Post 2019 guideline      | n/a       | 27        | 36        |
| p-value                  | n/a       | n.s.      | n.s.      |
| LDL-C, mg/dl; mean ± SD  |           |           |           |
| Pre 2019 guideline       | 131±28    | n/a       | 77±29     |
| Post 2019 guideline      | 141±23    | n/a       | 82±29     |
| p-value                  | n.s.      | n.s.      |           |
